# Supplementary material for: On generalized partition methods for interaction energies
Source: Royal Society of Chemistry journal article supplement (doi:10.1039/d0cp03087b), 2020-01-01
Supplement: d0cp03087b1.pdf [file d0cp03087b1.pdf]

## Supporting Information

### On generalized Partition Methods for Interaction Energies

Stefano Racioppi,<sup>\* a,c</sup> Angelo Sironi,<sup>a</sup> Piero Macchi<sup>b,d</sup>

In general, when  $n$  fragments ( $F$ ) are present,  $E_{int}^{frg}$  is the sum of  $n(n-1)/2$  inter-fragment interactions.

$$E_{int}^{frg} = \frac{1}{2} \sum_{\substack{F^i \neq F^j \\ F^i, F^j, \dots, F^n \in M}} E_{int}^{F^i, F^j} = \frac{1}{2} \sum_{\substack{F^i \neq F^j \\ F^i, F^j, \dots, F^n \in M}} \left( \sum_{A \in F^i} \sum_{B \in F^j} E_{int}^{AB} \right) \quad S(1)$$

$$\Delta E_{int}^{G,H} = E_{int}^{frg} + \Delta E_{Dint}^{F^i} + \dots + \Delta E_{Dint}^{F^n} = \frac{1}{2} \left( \sum_{\substack{A \neq B \\ A, B \in M}} E_{int}^{AB} - \sum_{\substack{A \neq B \\ A, B \in F^i}} E_{int, vac}^{AB} - \dots - \sum_{\substack{A \neq B \\ A, B \in F^n}} E_{int, vac}^{AB} \right) \quad S(2)$$

$$\Delta E_{Dself}^{frg} = \sum_{F \in M} \Delta E_{Dself}^F \quad S(3)$$

While  $E_{int}^{F^i, F^j}$  is the interaction energy between the basin  $A$  of the fragment  $F^i$  with the basin  $B$  of the fragment  $F^j$ . This summation runs over all the  $n$  fragments of the molecule ( $M$ ).

Coupling equations (S2) with (S3), the global energy binding contribution  $\Delta E_{bind}^{frg}$  of many interacting fragments is obtained.

$$\Delta E_{bind}^{frg} = \Delta E_{int}^{frg} + \Delta E_{Dself}^{frg} \quad S(4)$$

**Table S1.** Nomenclature of IQA energy terms computed with AIMALL.

| $E$            | Partition terms                             | AIMALL terms         |
|----------------|---------------------------------------------|----------------------|
| $E_{self}^A$   | $V_{ne}^A$                                  | $V_{ne}(A,A)$        |
|                | $V_C^A$                                     | $V_{eeC}(A,A)$       |
|                | $V_{xc}^A$                                  | $V_{eeXC}(A,A)$      |
|                | $T^A$                                       | $T(A)$               |
|                | $V_{nn}^{AD}$                               | $V_{nn}(A)$          |
| $E_{int}^{AB}$ | $V_{neen}^{AB} = V_{en}^{AB} + V_{ne}^{AB}$ | $V_{neen}^{AB}(A,A)$ |
|                | $V_C^{AD}$                                  | $V_{eeC}(A,A)$       |
|                | $V_{xc}^{AD}$                               | $V_{eeXC}(A,A)$      |

**Table S2.** Energy terms from EDA and IQA for the H<sub>3</sub>E---ZH<sub>3</sub> donor-acceptor interaction.

|                             | BH <sub>3</sub> |        |                 |        |                  |        | AlH <sub>3</sub> |        |                 |        |                      |        |
|-----------------------------|-----------------|--------|-----------------|--------|------------------|--------|------------------|--------|-----------------|--------|----------------------|--------|
|                             | NH <sub>3</sub> |        | PH <sub>3</sub> |        | AsH <sub>3</sub> |        | NH <sub>3</sub>  |        | PH <sub>3</sub> |        | AsH <sub>3</sub>     |        |
|                             | PIE/EDA         | RS-IQA | PIE/EDA         | RS-IQA | PIE/EDA          | RS-IQA | PIE/EDA          | RS-IQA | PIE/EDA         | RS-IQA | PIE/EDA <sup>a</sup> | RS-IQA |
| $\Delta E_{\text{bind}}$    | -41.7           | -41.9  | -34.5           | -33.5  | -24.6            | -24.4  | -30.2            | -30.4  | -15.5           | -15.8  | -12.3 (-10.9)        | -12.2  |
| $\Delta E_{\text{kinetic}}$ | 77.6            | 70.4   | 44.6            | 37.9   | 22.0             | 24.4   | 58.9             | 49.2   | 16.9            | 15.4   | 5.5 (7.0)            | 11.0   |
| $\Delta E_{\text{classic}}$ | -70.1           | -64.7  | -27.7           | -23.1  | -8.5             | -11.4  | -53.1            | -47.4  | -10.9           | -11.2  | -0.8 (-2.5)          | -6.7   |
| $\Delta E_{\text{XC}}$      | -49.2           | -47.6  | -51.3           | -48.4  | -38.1            | -37.4  | -36.0            | -32.3  | -21.5           | -19.9  | -17.0 (-15.3)        | -16.4  |
| %Classic                    | 58.8            | 57.6   | 35.1            | 32.3   | 18.2             | 23.4   | 59.6             | 59.5   | 33.5            | 36.1   | 4.4 (14.3)           | 29.0   |
| %XC                         | 41.2            | 42.4   | 64.9            | 67.7   | 81.8             | 76.6   | 40.4             | 40.5   | 66.5            | 63.9   | 95.6 (85.7)          | 71.0   |
| $\Delta E_{\text{Pauli}}$   | 110.2           |        | 119.7           |        | 90.3             |        | 58.6             |        | 41.2            |        | 33.0 (34.5)          |        |
| $\Delta E_{\text{els}}$     | -77.1           |        | -61.7           |        | -45.6            |        | -58.5            |        | -30.6           |        | -23.1 (-23.0)        |        |
| $\Delta E_{\text{orb}}$     | -74.8           |        | -92.5           |        | -69.3            |        | -30.4            |        | -26.1           |        | -22.2 (-22.4)        |        |
| % $\Delta E_{\text{els}}$   | 50.8            |        | 40.0            |        | 39.7             |        | 65.8             |        | 53.9            |        | 50.9 (50.6)          |        |
| % $\Delta E_{\text{orb}}$   | 49.2            |        | 60.0            |        | 60.3             |        | 34.2             |        | 46.1            |        | 49.1 (49.4)          |        |

<sup>a</sup> Values in parenthesis refer to energy terms computed with the level of theory BLYP/TZP

**Table S3.** Energy terms from EDA and IQA for the  $M^n(\text{CO})_4$  transition metal carbonyl compounds.

|                             | $[\text{Cu}(\text{CO})_4]^+$ |        | $\text{Ni}(\text{CO})_4$ |        | $[\text{Co}(\text{CO})_4]^-$ |        | $[\text{Fe}(\text{CO})_4]^{2-}$ |        |
|-----------------------------|------------------------------|--------|--------------------------|--------|------------------------------|--------|---------------------------------|--------|
|                             | PIE/EDA                      | RS-IQA | PIE/EDA                  | RS-IQA | PIE/EDA                      | RS-IQA | PIE/EDA                         | RS-IQA |
| $\Delta E_{\text{bind}}$    | -21.4                        | -21.5  | -30.8                    | -31.1  | -53.570                      | -54.1  | -78.2                           | -81.2  |
| $\Delta E_{\text{kinetic}}$ | 8.2                          | 7.3    | 64.8                     | 69.3   | 136.8                        | 138.9  | 227.4                           | 214.7  |
| $\Delta E_{\text{Classic}}$ | -29.9                        | -28.5  | -80.1                    | -84.1  | -147.0                       | -149.7 | -200.1                          | -206.2 |
| $\Delta E_{\text{XC}}$      | 0.3                          | -0.2   | -15.5                    | -16.3  | -43.3                        | -43.4  | -105.5                          | -89.7  |
| %Classic                    | 101.2                        | 99.2   | 83.8                     | 83.8   | 77.2                         | 77.5   | 65.5                            | 69.7   |
| %XC                         | -1.2                         | 0.8    | 16.2                     | 16.2   | 22.8                         | 22.5   | 34.5                            | 30.3   |
| $\Delta E_{\text{Pauli}}$   | 60.2                         |        | 116.1                    |        | 154.446                      |        | 169.9                           |        |
| $\Delta E_{\text{els}}$     | -50.6                        |        | -90.4                    |        | -117.909                     |        | -124.8                          |        |
| $\Delta E_{\text{orb}}$     | -30.9                        |        | -56.6                    |        | -90.107                      |        | -123.3                          |        |
| % $\Delta E_{\text{els}}$   | 62.1                         |        | 61.5                     |        | 56.683                       |        | 50.3                            |        |
| % $\Delta E_{\text{orb}}$   | 37.9                         |        | 38.5                     |        | 43.3                         |        | 49.7                            |        |

**Table S4.** Energy terms from EDA (basis-set ATZ2P) and IQA (basis-set 6-311+G(d,p) and aug-cc-PVQZ) tested with functionals B3LYP and M06-2X, for the  $\text{H}_3\text{N} \cdots \text{BH}_3$  interaction.

|                             | $\text{H}_3\text{N} \cdots \text{BH}_3$ |       |                        |                       |                  |
|-----------------------------|-----------------------------------------|-------|------------------------|-----------------------|------------------|
|                             | PIE/EDA                                 | B3LYP |                        | M06-2X                |                  |
|                             |                                         | ATZ2P | RS-IQA<br>6-311+G(d,p) | RS-IQA<br>aug-cc-PVQZ | PIE/EDA<br>ATZ2P |
| $\Delta E_{\text{bind}}$    | -41.7                                   | -41.9 | -42.2                  | -45.4                 | -45.2            |
| $\Delta E_{\text{kinetic}}$ | 77.6                                    | 70.4  | 77.7                   | 74.8                  | 66.5             |
| $\Delta E_{\text{Classic}}$ | -70.1                                   | -64.7 | -70.2                  | -68.6                 | -62.6            |
| $\Delta E_{\text{XC}}$      | -49.2                                   | -47.6 | -49.6                  | -51.6                 | -49.2            |
| %Classic                    | 58.8                                    | 57.6  | 58.6                   | 57.1                  | 56.0             |
| %XC                         | 41.2                                    | 42.4  | 41.4                   | 42.9                  | 44.0             |
| $\Delta E_{\text{Pauli}}$   | 110.2                                   |       |                        | 108.5                 |                  |
| $\Delta E_{\text{els}}$     | -77.1                                   |       |                        | -80.3                 |                  |
| $\Delta E_{\text{orb}}$     | -74.8                                   |       |                        | -73.6                 |                  |
| % $\Delta E_{\text{els}}$   | 50.8                                    |       |                        | 52.2                  |                  |
| % $\Delta E_{\text{orb}}$   | 49.2                                    |       |                        | 47.8                  |                  |
